# Supplementary material for: Probing topological protection using a designer surface plasmon structure
Source: PubMed Central journal article supplement (PMC4876474; doi:10.1038/ncomms11619), 2016-05-20
Supplement: ncomms11619-s1.pdf [file ncomms11619-s1.pdf]

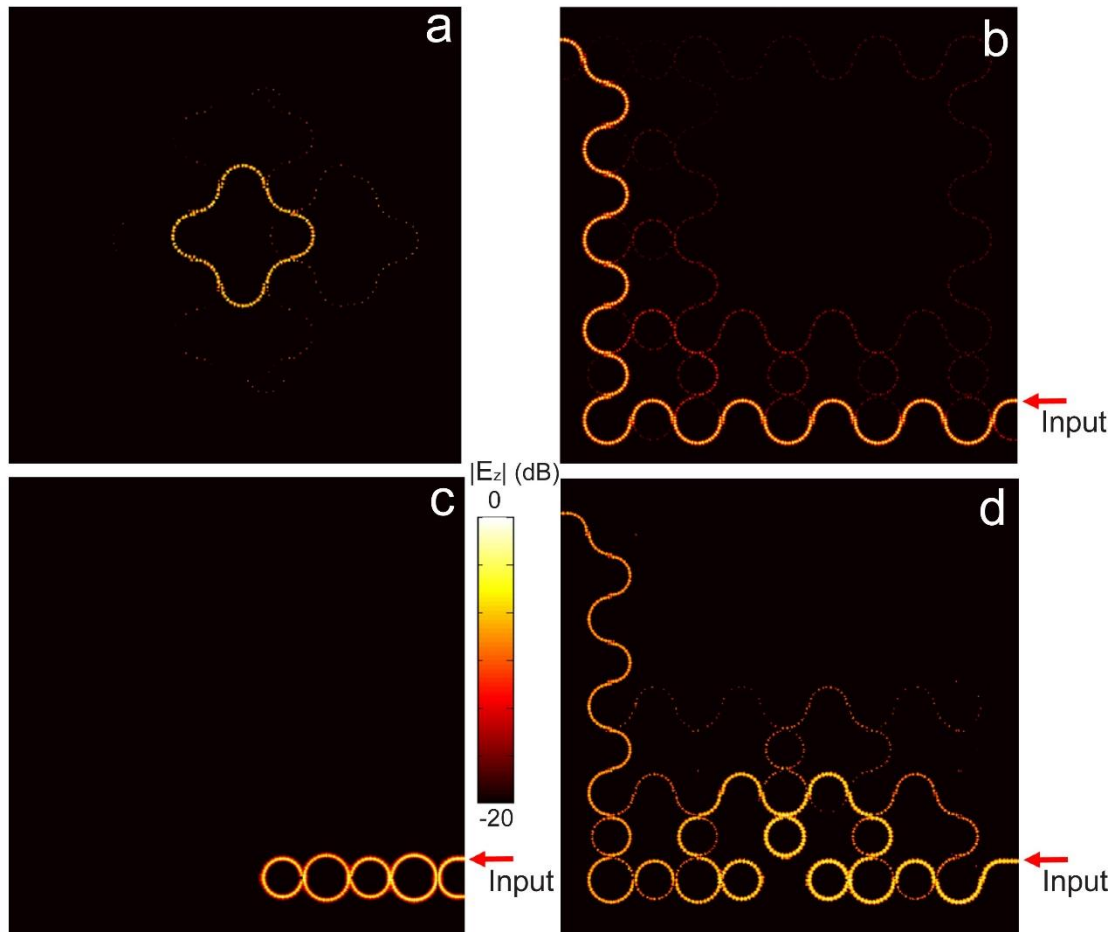

**Supplementary Figure 1 | Simulated field patterns according to experimental results in Fig. 4. a,** An insulating bulk state, corresponding to Fig. 4b. **b,** A topological edge state, corresponding to Fig. 4c. **c,** States on a 1D lattice, corresponding to Fig. 4e. **d,** Circumvention of the topological edge state around a defect ring with 3.5mm height, corresponding to Fig. 4g.

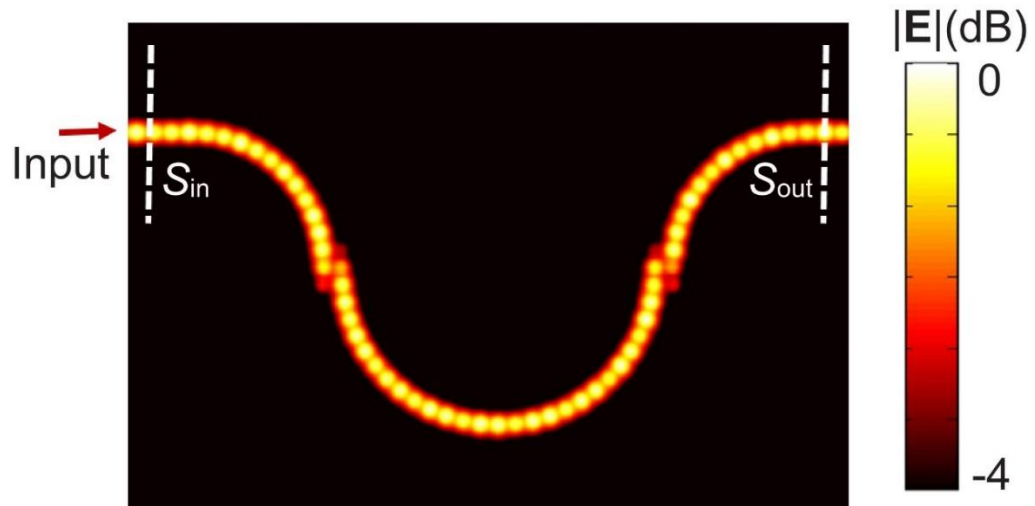

**Supplementary Figure 2 | Simulation of coupling through a unit cell in the topological designer surface plasmon structure.** The frequency is at 11.3 GHz.

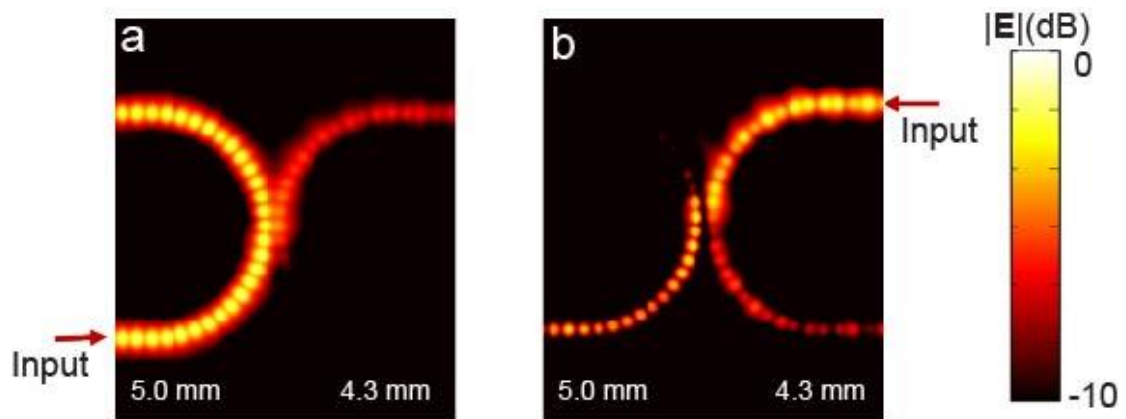

**Supplementary Figure 3 | Simulation of coupling between a 5-mm-tall ring to a 4.3-mm-tall ring.** The frequency is at 11.3 GHz. **a**, Input from the 5-mm-tall ring. **b**, Input from the 4.3 mm-tall ring.

## Supplementary Note 1. Transfer Matrix Analysis and Topological Transition

The schematic of a unit cell for the square lattice network is shown in Fig. 2 in the main text. Here we give detailed calculations on band structure. Let  $n \equiv (x_n, y_n)$  denote the site of unit cell. In each unit cell, input amplitudes can be described by a four-vector  $(a_{1,n}, a_{2,n}, a_{3,n}, a_{4,n})$ , and output amplitudes by another four-vector  $(b_{1,n}, b_{2,n}, b_{3,n}, b_{4,n})$ . The coupling between the sites at  $n$  and  $n+x$  can be described as  $\begin{bmatrix} a_{2,n} \\ a_{4,n+x} \end{bmatrix} = S_{nx} \begin{bmatrix} b_{1,n} \\ b_{3,n+x} \end{bmatrix}$  and the coupling between the sites at  $n$  and  $n+y$  can be described as  $\begin{bmatrix} a_{1,n} \\ a_{3,n+y} \end{bmatrix} = S_{ny} \begin{bmatrix} b_{4,n} \\ b_{2,n+y} \end{bmatrix}$ , where  $S_{nx} = S_{ny} = S_n = \begin{bmatrix} r & t' \\ t & r' \end{bmatrix}$  is a unitary matrix containing four complex numbers  $r, r', t$  and  $t'$ . Combining together, we can write down the following scattering matrix equation

$$\begin{bmatrix} a_{1,n} \\ a_{2,n} \\ a_{3,n+y} \\ a_{4,n+x} \end{bmatrix} = \begin{bmatrix} 0 & t' & 0 & r \\ r & 0 & t' & 0 \\ 0 & r' & 0 & t \\ t & 0 & r' & 0 \end{bmatrix} \begin{bmatrix} b_{1,n} \\ b_{2,n+y} \\ b_{3,n+x} \\ b_{4,n} \end{bmatrix} \quad (1)$$

This periodic network allows Bloch theorem to apply. We can thus get

$$\begin{bmatrix} a_{1,n} \\ a_{2,n} \\ a_{3,n+y} \\ a_{4,n+x} \end{bmatrix} = \begin{bmatrix} 1 & 0 & 0 & 0 \\ 0 & 1 & 0 & 0 \\ 0 & 0 & e^{iK_y} & 0 \\ 0 & 0 & 0 & e^{iK_x} \end{bmatrix} \begin{bmatrix} a_{1,n} \\ a_{2,n} \\ a_{3,n} \\ a_{4,n} \end{bmatrix}$$

$$\begin{bmatrix} b_{1,n} \\ b_{2,n+y} \\ b_{3,n+x} \\ b_{4,n} \end{bmatrix} = \begin{bmatrix} 1 & 0 & 0 & 0 \\ 0 & e^{iK_y} & 0 & 0 \\ 0 & 0 & e^{iK_x} & 0 \\ 0 & 0 & 0 & 1 \end{bmatrix} \begin{bmatrix} b_{1,n} \\ b_{2,n} \\ b_{3,n} \\ b_{4,n} \end{bmatrix} \quad (2)$$

After substituting Eq. (2) into Eq. (1), we can get:

$$\begin{bmatrix} a_{1,n} \\ a_{2,n} \\ a_{3,n} \\ a_{4,n} \end{bmatrix} = \begin{bmatrix} 1 & 0 & 0 & 0 \\ 0 & 1 & 0 & 0 \\ 0 & 0 & e^{-iK_y} & 0 \\ 0 & 0 & 0 & e^{-iK_x} \end{bmatrix} \begin{bmatrix} 0 & t' & 0 & r \\ r & 0 & t' & 0 \\ 0 & r' & 0 & t \\ t & 0 & r' & 0 \end{bmatrix} \begin{bmatrix} 1 & 0 & 0 & 0 \\ 0 & e^{iK_y} & 0 & 0 \\ 0 & 0 & e^{iK_x} & 0 \\ 0 & 0 & 0 & 1 \end{bmatrix} \begin{bmatrix} b_{1,n} \\ b_{2,n} \\ b_{3,n} \\ b_{4,n} \end{bmatrix} \quad (3)$$

By expressing  $\begin{bmatrix} a_{1,n} \\ a_{2,n} \\ a_{3,n} \\ a_{4,n} \end{bmatrix} = e^{-i\phi} \begin{bmatrix} b_{1,n} \\ b_{2,n} \\ b_{3,n} \\ b_{4,n} \end{bmatrix}$  in Eq. (3), we rewrite the governing scattering matrix

equation as:

$$S(K)|b_K\rangle = e^{-i\phi}|b_K\rangle \quad (4)$$

where  $S(K) = \begin{bmatrix} 1 & 0 & 0 & 0 \\ 0 & 1 & 0 & 0 \\ 0 & 0 & e^{-iK_y} & 0 \\ 0 & 0 & 0 & e^{-iK_x} \end{bmatrix} \begin{bmatrix} 0 & t' & 0 & r \\ r & 0 & t' & 0 \\ 0 & r' & 0 & t \\ t & 0 & r' & 0 \end{bmatrix} \begin{bmatrix} 1 & 0 & 0 & 0 \\ 0 & e^{iK_y} & 0 & 0 \\ 0 & 0 & e^{iK_x} & 0 \\ 0 & 0 & 0 & 1 \end{bmatrix}$ ,  $|b_K\rangle = \begin{bmatrix} b_{1,n} \\ b_{2,n} \\ b_{3,n} \\ b_{4,n} \end{bmatrix}$ .

Following the same parameterization process in Ref. 20, the unitary scattering matrix

$$S_n = \begin{bmatrix} r & t' \\ t & r' \end{bmatrix} \text{ can be rewritten as } \begin{bmatrix} \sin\theta e^{i\chi} & -\cos\theta e^{i(\varphi-\xi)} \\ \cos\theta e^{i\xi} & \sin\theta e^{i(\varphi-\chi)} \end{bmatrix}, \text{ where } \theta, \text{ representing}$$

the coupling strength between neighboring rings, is relevant with amplitudes of  $r$  and

$t$ , and  $\chi, \varphi, \xi$  are relevant with phases of  $r$  and  $t$ . We choose  $\chi = -0.24\pi, \varphi =$

$\pi, \xi = 0$ , extracted from simulated transmission of a unit cell at 11.3 GHz. The band

structure of a semi-infinite strip with 50 lattices in  $y$  direction and periodic in  $x$  direction

is plotted in Fig. 2c in the main text, where  $\theta = 0.2\pi$  for weak coupling,  $\theta = 0.25\pi$

for critical coupling, and  $\theta = 0.4\pi$  for strong coupling, respectively.

## Supplementary Note 2. Retrieval of coupling strength $\theta$

Parameter  $\theta$  describes coupling strength between neighboring lattice rings, which

depends on both frequency  $\omega$ , and ring-ring distance  $g$ . Topological nontrivial phase

occurs above the critical  $\theta = 0.25\pi$ , while trivial phase occurs below this critical  $\theta$  value.

In real structures that support narrowband designer surface plasmons, we tune  $g$  to

realize different topological phases. To match with band diagrams, we retrieved  $\theta$  with

$\theta = \text{asin}^{-1}[(I_{\text{out}}/I_{\text{in}})^{1/2}]$  from simulations on a unit cell, where  $I_{\text{in}}$  is the power delivered

into the unit cell through the input plane  $S_{\text{in}}$ , and  $I_{\text{out}}$  is the output power through the output plane  $S_{\text{out}}$ , as marked in Fig. S2. Topological edge state at 11.3 GHz has  $\theta = 0.41\pi (\pm 0.03\pi$  within the topological band gap), larger than  $0.25\pi$ . Note that the coupling strength  $\theta$  characterizes the inter-ring coupling, not the propagation loss. Therefore, the measured propagation loss of 1.44 dB per lattice constant is irrelevant here. Regarding the topologically trivial phase with  $g = 7.5$  mm, the demonstrated bulk state at 11.3 GHz corresponds to  $\theta = 0.10\pi$ , smaller than  $0.25\pi$ , and the in-gap excitation at 11.45 GHz corresponds to  $\theta = 0.08\pi$ , also smaller than  $0.25\pi$ .

### **Supplementary Note 3. Coupling between a 5.0-mm ring and a 4.3-mm ring**

In experiment, the 4.3-mm-tall ring is used as a defect and later used as the input waveguide. In Fig. S3, we simulate the coupling between a 5.0-mm-tall ring and a 4.3-mm-tall ring. We can see in Fig. S3a that, the wave coupled from the 5.0-mm-tall ring to the 4.3-mm-tall ring is minimal ( $\sim 7$ dB) and the wave maintains its propagation ( $\sim 1$ dB) on the 5.0-mm-tall ring without reflection. In Fig. S3b, the coupling from the 4.3-mm-tall ring to the 5.0-mm-tall ring is also weak ( $\sim 7$ dB). There is moderate radiation on the 4.3-mm-tall ring because of its relatively weak capability of confining the wave energy of designer surface plasmons.
